# Supplementary material for: Argininosuccinate lyase deficiency causes blood-brain barrier disruption via nitric oxide–mediated dysregulation of claudin expression
Source: JCI journal article supplement (doi:10.1172/jci.insight.168475), 2023-07-25
Supplement: sd1 [file 1]

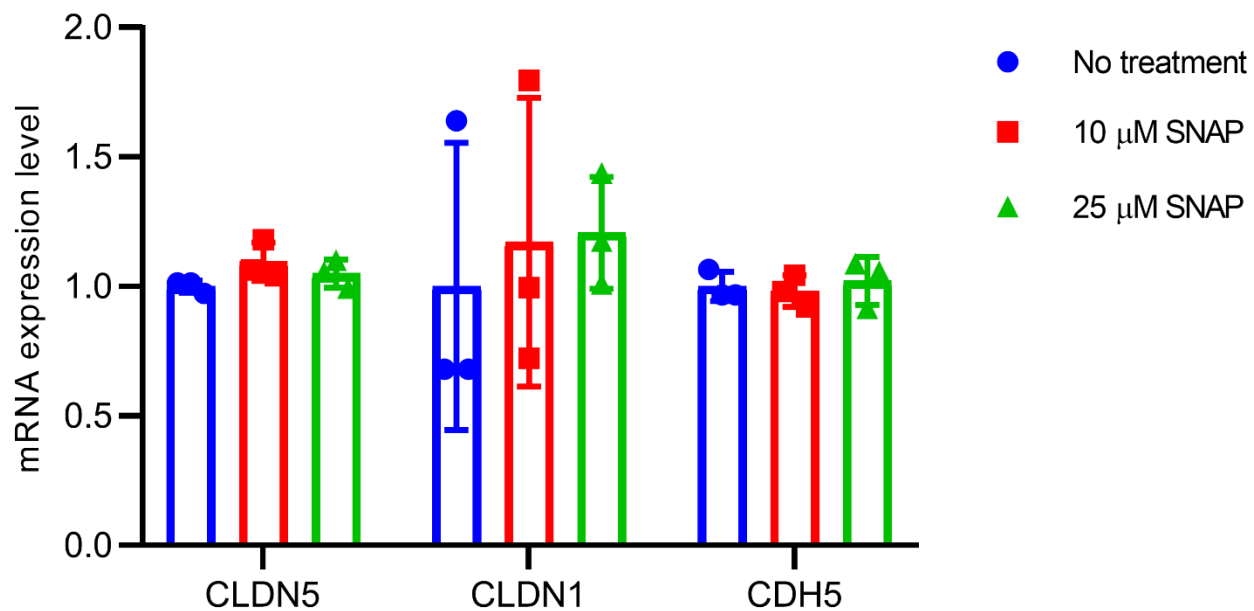

**Supplementary Figure 1. Effects of NO Donor on mRNA expression of BBB genes**

mRNA expression of *CLDN5*, *CLDN1*, and *CDH5* in HBMECs treated with 0, 10, or 25 μM of S-nitroso-N-acetylpenicillamine (SNAP), an NO donor (n = 3). Bar graphs represent mean values while error bars represent the standard deviation. One-way ANOVA, multiple comparisons.

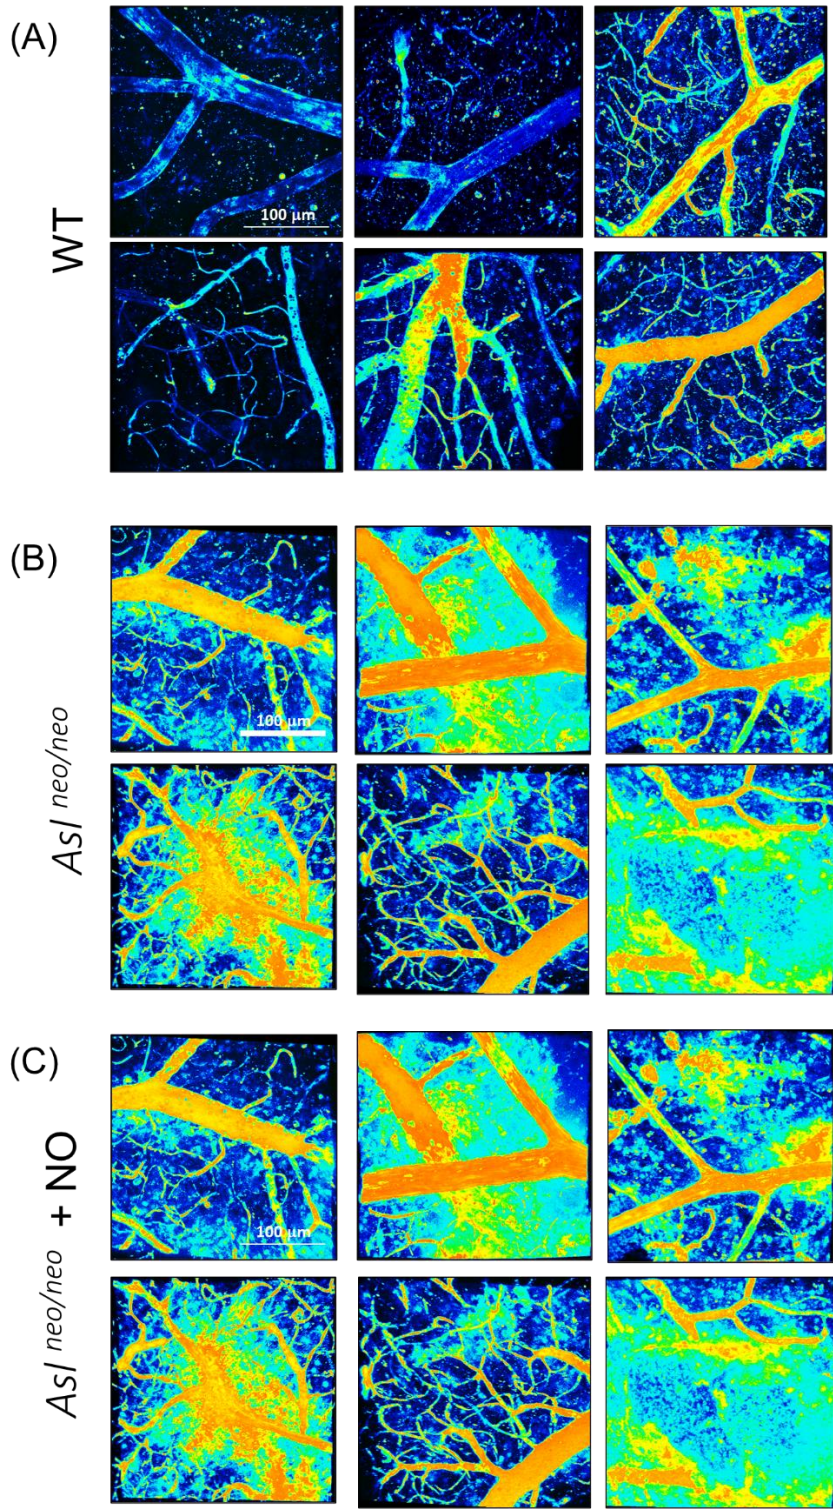

**Supplementary Figure 2. Additional images to supplement Figure 4.** Two-photon images of cerebral vasculature in (A) WT, (B) mutant ( $As1^{Neo/Neo}$ ), and (C) sodium nitrite-treated mutant mice ( $As1^{Neo/Neo} + NO$ ) after Evans blue-fluorescent tracer injection.

| Gene            |                                                   | FPKM      |        | log2(fold change) |
|-----------------|---------------------------------------------------|-----------|--------|-------------------|
|                 |                                                   | siControl | siASL  |                   |
| <i>ASL</i>      | Argininosuccinate lyase                           | 15.06     | 0.52   | -4.86             |
| <i>CLDN1</i>    | Claudin-1                                         | 0.22      | 5.10   | 4.52              |
| <i>CLDN5</i>    | Claudin-5                                         | 148.30    | 45.59  | -1.70             |
| <i>CDH5</i>     | Cadherin-5                                        | 668.29    | 177.28 | -1.91             |
| <i>ABCB1</i>    | Multidrug resistance protein 1 (P-glycoprotein 1) | 1.47      | 1.07   | -0.45             |
| <i>HSP90AA1</i> | Heat shock protein HSP 90-alpha                   | 369.38    | 437.26 | 0.24              |

**Supplementary Table 1.** Effects of ASL deficiency on expression of BBB-associated genes in human aortic endothelial cells (HAECs).

| <b>Patient</b>                                      | <b>1</b>                            | <b>2</b>                                              | <b>3</b>                  | <b>4</b>                                       |
|-----------------------------------------------------|-------------------------------------|-------------------------------------------------------|---------------------------|------------------------------------------------|
| Sex                                                 | Female                              | Male                                                  | Female                    | Male                                           |
| Age of diagnosis                                    | Birth                               | Birth                                                 | -                         | 3.5 years                                      |
| Diagnosis                                           | Newborn screen, biochemical testing | Clinical symptoms, biochemical testing                | -                         | Clinical symptoms, biochemical testing         |
| Genotype (NM_000048.3)                              | c.1060C>T (p.Gln354Ter), homozygous | c.765dupG (p.Met256Aspfs*79), c.1193C>A (p.Ala398Asp) | -                         | c.557G>A (p.Arg186Gln), c.857A>G (p.Gln286Arg) |
| <b>Patient demographics at the time of MRI</b>      |                                     |                                                       |                           |                                                |
| Age                                                 | 3 y 9 mo                            | 10 y                                                  | 33 y                      | 21 y                                           |
| Weight in kg (Z-score)                              | 16.5 (0.53)                         | 30.3 (-0.59)                                          | 55.7                      | 88.1                                           |
| Height in cm (Z-score)                              | 102.4 (0.72)                        | 122 (-2.72)                                           | 155.2                     | 185.1                                          |
| <b>Treatment at the time of MRI</b>                 |                                     |                                                       |                           |                                                |
| Liver transplant (age)                              | Yes (4 years old)                   | No                                                    | No                        | No                                             |
| Arginine dose (g/m <sup>2</sup> )                   | 2.2                                 | 1.8                                                   | 10                        | 1.87                                           |
| Nitrogen scavengers                                 | Yes                                 | Yes                                                   | No                        | No                                             |
| Protein restriction (% DRI)                         | No (100%)                           | No (100%)                                             | No (Not counting protein) | Yes (50%)                                      |
| <b>Phenotype</b>                                    |                                     |                                                       |                           |                                                |
| Highest recorded ammonia in medical record (μmol/L) | 350                                 | 216                                                   | <9                        | 27                                             |
| Number of hyperammonemic episodes                   | 6                                   | 5                                                     | 0                         | 0                                              |
| Intellectual Disability                             | No                                  | Yes                                                   | Yes                       | Yes                                            |
| Seizures                                            | No                                  | No                                                    | Yes                       | No                                             |
| Spasticity                                          | No                                  | Yes                                                   | Yes                       | No                                             |
| Hypertension                                        | No                                  | No                                                    | No                        | Yes                                            |

"-" datum not available

**Supplementary Table 2.** Demographic data of the patients with ASLD evaluated in the study.
